# Supplementary material for: Evidence of Partial Migration in a Large Coastal Predator: Opportunistic Foraging and Reproduction as Key Drivers?
Source: PLOS journal article supplement (doi:10.1371/journal.pone.0147608), 2016-02-03
Supplement: S1 (10.1371/journal.pone.0147608.s001) [file journal.pone.0147608.s001]

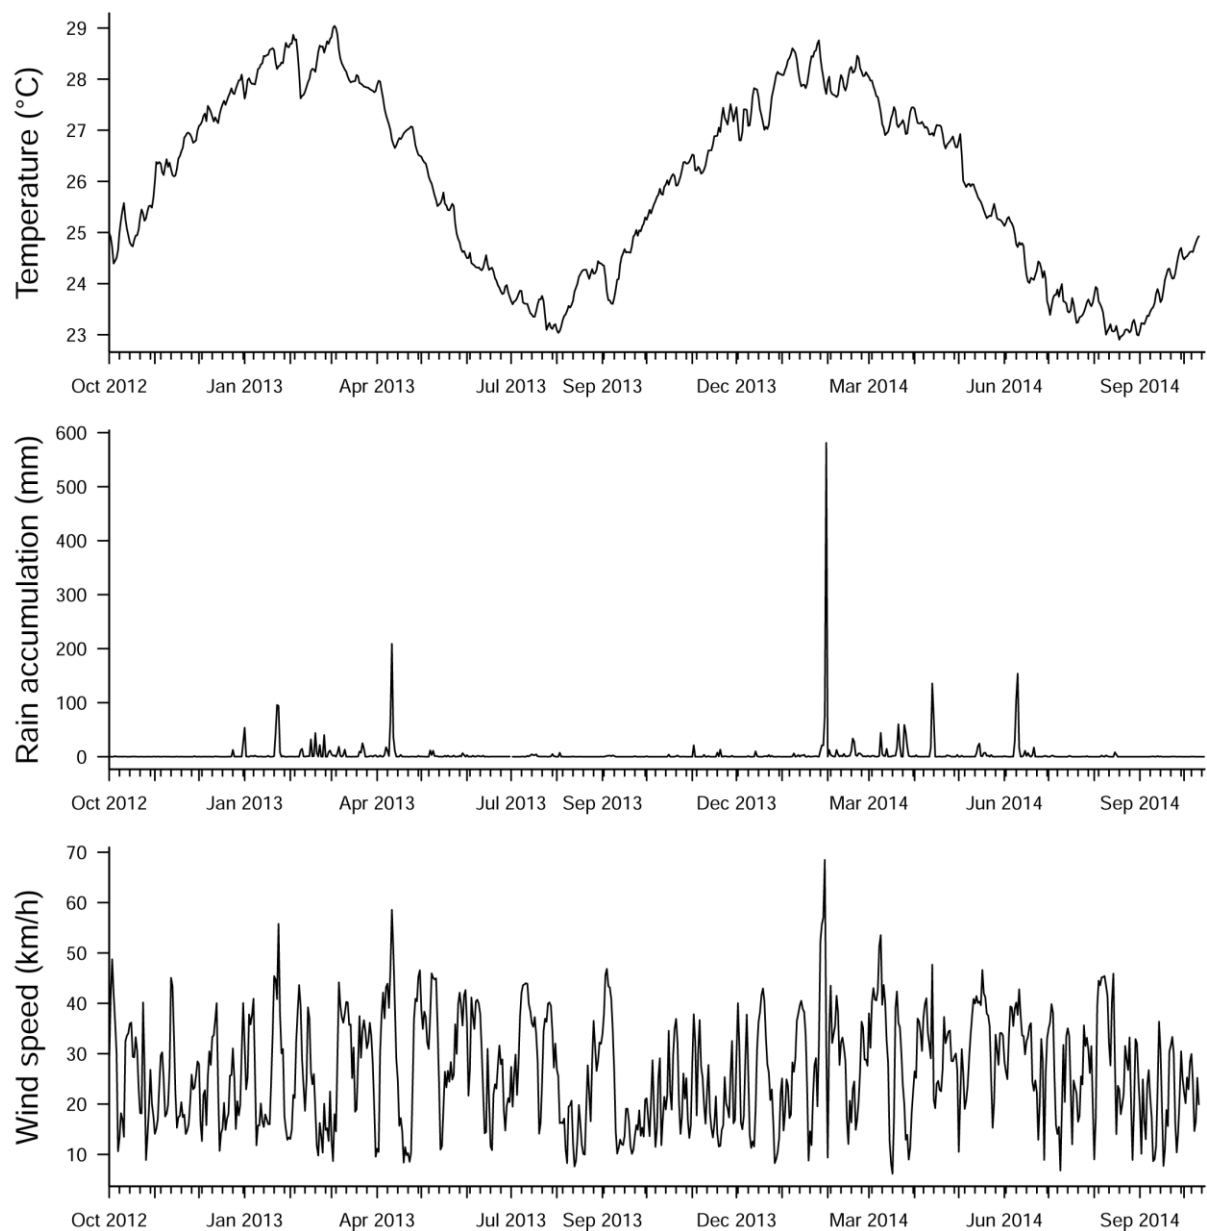

S1 Fig. Daily environmental values for the Townsville Reefs, central Great Barrier Reef.

Data were obtained from Australian Institute of Marine Science weather stations located at Davies, Rib, Kelso and Dip reefs (<http://data.aims.gov.au/>).
