# Supplementary material for: Evidence of Partial Migration in a Large Coastal Predator: Opportunistic Foraging and Reproduction as Key Drivers?
Source: PLOS journal article supplement (doi:10.1371/journal.pone.0147608), 2016-02-03
Supplement: S2 (10.1371/journal.pone.0147608.s002) [file journal.pone.0147608.s002]

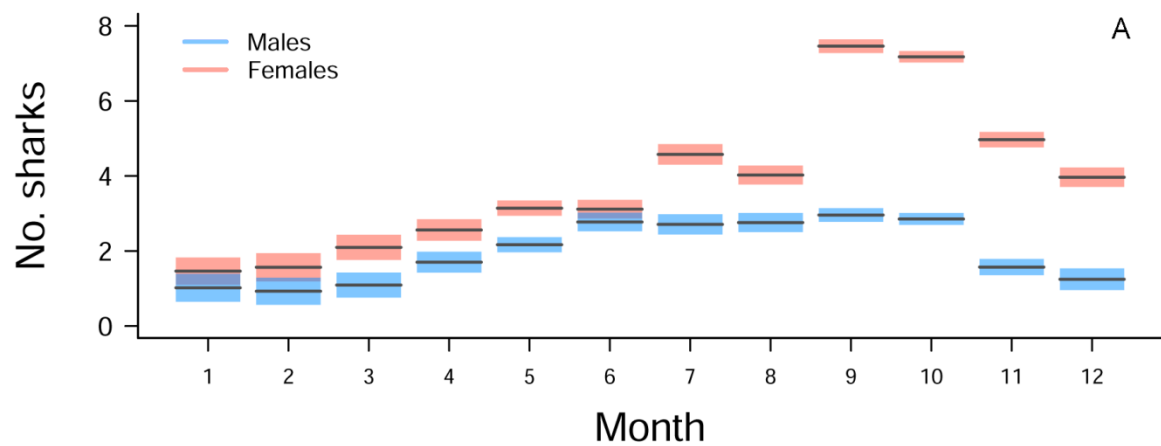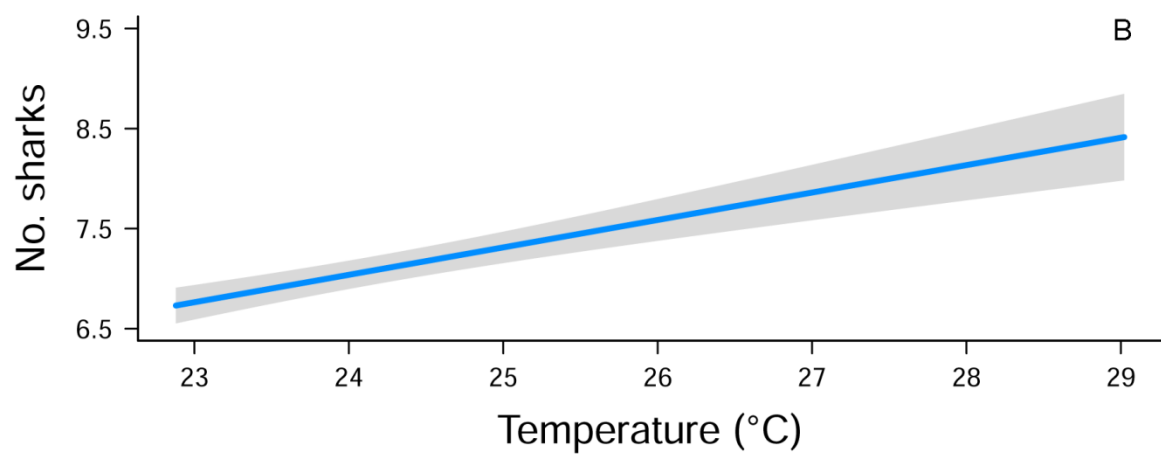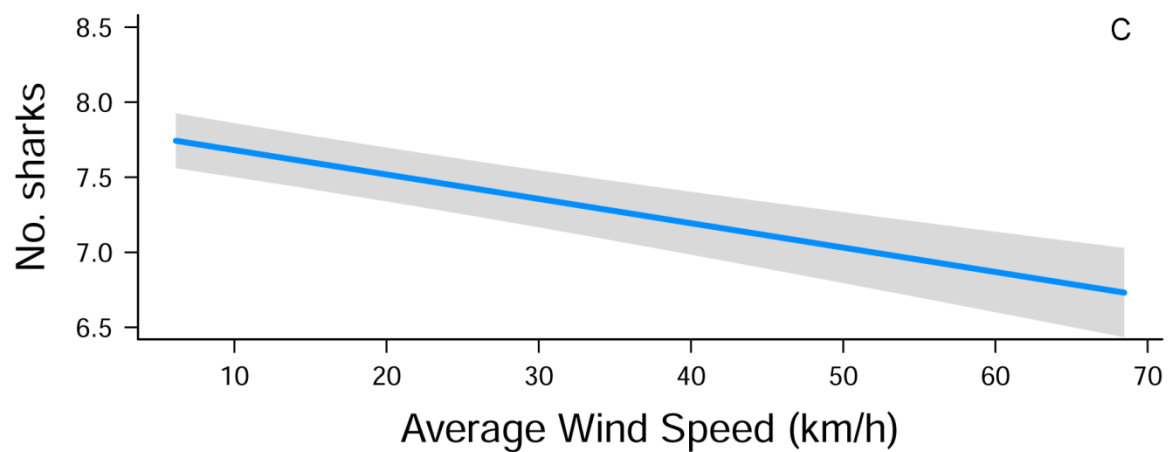

S2 Fig. Generalized Linear Model results showing factors that influenced the number of sharks detected in the Townsville Reefs.
