# Supplementary material for: Evidence of Partial Migration in a Large Coastal Predator: Opportunistic Foraging and Reproduction as Key Drivers?
Source: PLOS journal article supplement (doi:10.1371/journal.pone.0147608), 2016-02-03
Supplement: S3 (10.1371/journal.pone.0147608.s003) [file journal.pone.0147608.s003]

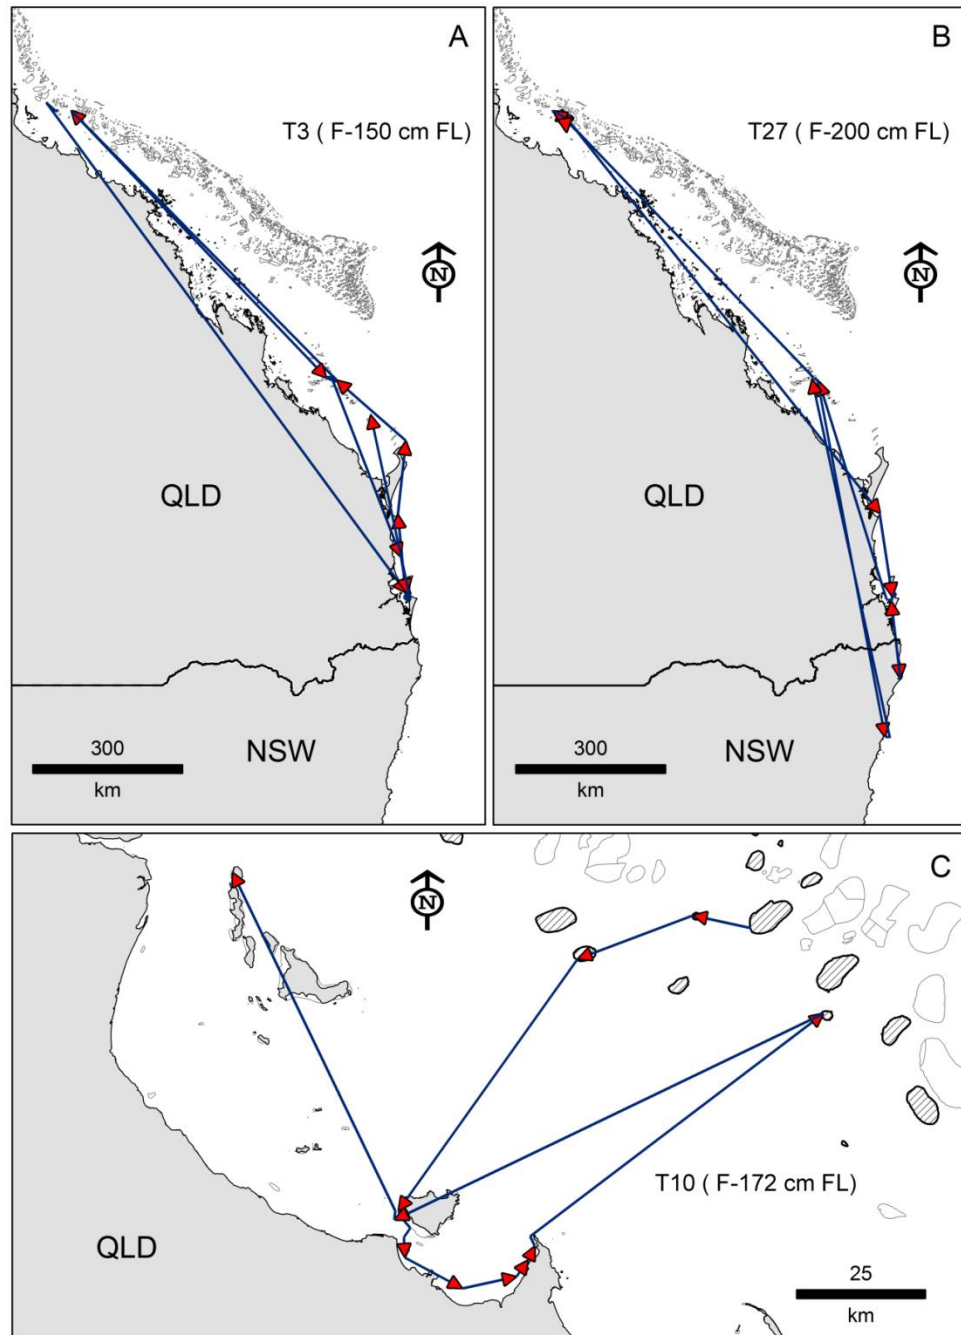

Fig S3. Movement trajectories of three bull sharks (*Carcharhinus leucas*) monitored in the central Great Barrier Reef.
